# Supplementary material for: The treatment of pectus carinatum with the bracing after surgery for congenital heart disease: experience from a single institution
Source: Research Square preprint supplement (doi:10.21203/rs.3.rs-403731/v1), 2021-04-13
Supplement: Supplementary file 1 [file fbcbf7d5352530e612c1f985.doc]

Table 1Demographic Date

|  | mean | Range |
| --- | --- | --- |
| Age(months)  Height(cm)  Weight(kg)  Body mass index  AP chest(cm)  0 month  3 months  6 months  9 months | 61.7  105.3  16.8  15.0  16.9  12.2  8.6  7.4 | 35.0-120.0  90.0-138.0  13.0-26.0  13.7-15.0  15.0-20.0  6.0-20.0  5.0-15.0  5.0-12.0 |
|  | % | n |
| Gender(M)  Deformity degree  Mild  Moderate  Severe  Asymmetric PC deformity  Brace side effect  Thoracalgia  Shortness of breath  Petechial bleeding  Palpitation | 75.0%  83.3%  16.7%  0.0%  79.2%  12.5%  12.5%  16.7%  8.3% | 18  20  4  0  19  3  3  4  2 |

AP=anterior–posterior diameter
